# Supplementary material for: Examining the evidence for sustained transpiration during heatextremes
Source: Copernicus journal article supplement (doi:10.5194/bg-2018-399), 2018-09-24
Supplement: Supplementary file [file bg-2018-399-AC1-supplement.pdf]

1 We thank the reviewer for their constructive comments and we address their various  
2 concerns below. Referee comments are highlighted in bold, with our response below in  
3 each case.

4

5 **Prompted by recent observations from chamber measurements of a decoupling**  
6 **between photosynthesis and transpiration at high temperatures, De Kauwe and**  
7 **colleagues examine eddy covariance flux data to see whether such decoupling can**  
8 **be observed at the ecosystem scale. To my mind, this manuscript suffers from**  
9 **several important inadequacies, and requires major revision before it would be**  
10 **acceptable for publication. Anticipating that some of my criticisms will be viewed**  
11 **as controversial, I will nonetheless lay them all out, so that the editor can**  
12 **determine which (if any) deserve to be taken into consideration:**

13 **1. Both Tier-1 FLUXNET2015 data and OzFlux data suffer doubts regarding their**  
14 **validity due to their persistent failure to demonstrate conformity with the**  
15 **principle of energy conservation (i.e., to close the surface energy budget).**  
16 **Although it might be going too far to say that it is inappropriate to download and**  
17 **analyze such data as the authors have done, neither do I think it is correct for this**  
18 **issue to be neglected entirely. Specifically, I am not aware that anyone has looked**  
19 **at the effect of heat waves on the energy balance closure, but this would certainly**  
20 **seem to be germane to the scientific questions that the authors are posing in the**  
21 **context of dataset validity. Also, although the FLUXNET2015 database includes a**  
22 **GPP variable, this is not measured by flux towers and the procedure from which**  
23 **it is inferred is of dubious validity during conditions of extreme heat stress. Given**  
24 **that the authors are attempting to tease out subtle temperature dependencies of**  
25 **GPP (which is not measured directly) and LE (which fails energy conservation**  
26 **checks), it seems inappropriate to me that such issues are not mentioned at all in**  
27 **this paper.**

28 We appreciate the Reviewers concerns on this issue.

29

30 We note in response to their statement about GPP that on page 6 of our submission that  
31 we stated: *“Our analysis also relies on GPP which is not directly observed but is*  
32 *instead modelled using assumptions related to the extrapolation of night-time*

33 *respiration (ER) and measured net ecosystem exchange. It is debatable whether these*  
34 *assumptions hold at very high temperatures, and examining these modelled GPP*  
35 *estimate estimates at high temperatures warrants further investigation particular as*  
36 *researchers leverage these data to explore the responses of the vegetation to*  
37 *temperature extremes.”*

38

39 In revision, we will add a caveats section to our new discussion section (see next  
40 response) where we will discuss issues related to the GPP data and the energy balance  
41 closure issue in relation to the latent heat flux. Furthermore, despite caveats, eddy  
42 covariance data represent one of our key constraints on the carbon, energy and water  
43 cycles and are regularly used to probe ecosystem responses to extremes (e.g. von  
44 Buttler, et al. 2018: Impacts of droughts and extreme-temperature events on gross  
45 primary production and ecosystem respiration: a systematic assessment across  
46 ecosystems and climate zones, Biogeosciences, 15, 1293-1318).

47

48 **2. The paper draws no concrete conclusions, partly I think because the**  
49 **organisation of the manuscript is below standard.**

50 We would disagree with this interpretation. In our paper we tested whether a  
51 photosynthetic decoupling mechanism identified in whole-tree chamber experiments  
52 (e.g. Drake et al. 2018, Global Change Biology) was present at the ecosystem scale. As  
53 our results demonstrate, outside of the experimental environmental, it is difficult to  
54 isolate such a mechanism. In so far as we can draw conclusions from the FLUXNET  
55 data, we did not find strong support for the original experimental result. However,  
56 absence of evidence is not evidence of absence and as result, to be more concrete with  
57 our conclusions given some the caveats of the data felt unwarranted. As a result, we  
58 discussed the need for new field-based studies to tackle this issue further.

59

60 **The paper contains about 1 page of introduction, 1.5 pages of methods, and 2.5**  
61 **pages of "Results and discussion" to which will be added five figures and a table.**  
62 **This last section makes for difficult reading, in part because the authors appear to**  
63 **make little effort to distinguish between the facts and their inter- pretations**  
64 **thereof. Furthermore, the paper contains no equations whatsoever, despite the**

65 fact that the authors plot a variable (the product of GPP and the square root of  
66 the vapour pressure deficit) whose grouping cannot be justified (see comment  
67 number 3 below). All of these structural shortcomings make it particularly  
68 difficult for the reader to extract and evaluate the underlying message of the  
69 manuscript. I believe that the paper would be much better organised with a  
70 classical structure of 1. Introduction 2. Methods 3. Results 4. Discussion & 5.  
71 Conclusions.

72 We are happy to reorganise our manuscript as suggested by the reviewer and this will  
73 allow us to tackle the issue they highlighted in their first comment.

74

75 **3. According to the abstract, an important aspect of the paper addresses "the role  
76 of vapour pressure deficit" (D). The authors describe this in terms of the  
77 "theoretical expectation of the effect of D on  $g_s$ " (page 3, line 27), citing previous  
78 works in this regard. Although not explicitly appearing in this manuscript, the  
79 "equation" underlying this idea is eq. (7) from the 2011 paper by Medlyn et al.,  
80 which is demonstrably in- correct. One of the major contributions to science of  
81 Joseph Fourier is the criterion of "dimensional homogeneity", which states that  
82 only quantities with the same dimen- sion can be compared, equated, added or  
83 subtracted. An obvious example would be the ridiculous statement that one  
84 kilometer is greater than one second. At the risk of sounding harsh, I must point  
85 out that equation (7) of the Medlyn et al. (2011) paper is equally absurd, and  
86 should not be considered as a "theoretical expectation". This ab- surdity seems to  
87 me to be a likely explanation for the fact that no units are included on the abscissa  
88 of Figure 5 of the De Kauwe et al manuscript, defined by a combination of  
89 variables (again: the product of GPP and the square root of the vapour pressure  
90 deficit; since it would be fitting for such a group of variables to be defined and  
91 assigned a symbol, I will call it Beta). The units of Beta would necessarily include  
92 the square root of a pressure unit such as mb or Pa (equivalent to the square root  
93 of a  $kg\ m^{-1}\ s^{-2}$ ). My guess is that the unpleasantness of such a unit caused it to be  
94 excluded in the axis label. I would argue that Beta should be rejected altogether  
95 based on the powerful tool of dimensional analysis, which invalidates eq. (7) from  
96 the 2011 Medlyn et al. paper.**

97 We will add the equation underlying the analysis; the equation is given in the  
98 corrigendum to the Medlyn et al. (2011) paper, as well as many publications since, and  
99 is as follows:

$$100 \quad g_s \approx 1.6 \left( 1 + \frac{g_1}{\sqrt{D}} \right) \frac{A}{C_a}$$

101 Where  $g_s$  is stomatal conductance ( $\text{mol m}^{-2} \text{s}^{-1}$ ),  $A$  is the net assimilation rate ( $\mu\text{mol m}^{-2}$   
102  $\text{s}^{-1}$ ),  $C_a$  is the  $\text{CO}_2$  concentration ( $\mu\text{mol mol}^{-1}$ ),  $D$  is the vapour pressure deficit (kPa)  
103 and the parameter  $g_1$  ( $\text{kPa}^{0.5}$ ) is a fitted parameter representing the sensitivity of the  
104 conductance to the assimilation rate. A full derivation for this equation is provided by  
105 Medlyn et al. (2011). It is unclear why the reviewer thinks it is “absurd” – the equation  
106 is dimensionally correct. We agree that one should not equate different dimensions, but  
107 it is perfectly sensible to relate different dimensions: an equation may relate degrees of  
108 temperature to metres gained in elevation, for example.

109

110 Regarding the Figures: as explained in detail in the paper by Medlyn et al. (2011), it is  
111 not possible to visualise this non-linear relationship directly, but a useful approximation  
112 that allows the relationship to be visualised is to ignore the “1+” term and plot  $g_s$  vs  
113  $A/(C_a \sqrt{D})$ . The slope of this relationship is then related to the parameter  $g_1$ . This  
114 visualisation approach is taken here but expressed in terms of transpiration. We can add  
115 further explanation of this visualisation approach to the text.

116

117 We did not include units in a similar way to other authors who have expressed water  
118 use efficiency in this fashion (e.g. Zhou, S., B. Yu, Y. Huang, and G. Wang (2014),  
119 The effect of vapor pressure deficit on water use efficiency at the subdaily time scale,  
120 Geophys. Res. Lett., 41, 5005–5013, doi: 10.1002/2014GL060741.). We are happy to  
121 include units on the axis of the revised figure. In addition, we will also add to the revised  
122 methods a fuller explanation for where this equation comes from.

123

124 **4. The ordinates of figures 3 and 4 are labelled with "density", a variable that**  
125 **normally would have units such as kg m<sup>-3</sup>. Rather, I believe that what the authors**  
126 **have plotted is a frequency of occurrence, which is a fractional, non-dimensional**

127 **quantity that requires no units. However, since the values in figure 3 go well above**  
128 **unity, I suspect that they should be described in terms of percent (%). In any event,**  
129 **I think this needs to be clarified.**

130 The plot is correct, and the confusion here relates to the normalisation of densities in  
131 the kernel density estimate. This is essentially the difference between probability mass  
132 functions (discrete variable) and probability density functions (continuous), the former  
133 no longer integrates to 1. We will clarify this point in our revision.

134

135 **5. (This final comment may be viewed by the editor as excessively ego-centric on**  
136 **the part of the reviewer. Nonetheless I feel obligated to point it out.) I have applied**  
137 **the laws of physics to demonstrate that the paradigm underlying the definition of**  
138 **the "stomatal conductance" is fundamentally incorrect (Kowalski, Atmos. Chem.**  
139 **Phys., 17, 8177–8187, 2017), and furthermore to \*predict\* a decoupling of**  
140 **transpiration and**

141 **photosynthesis at high temperatures. The long-standing paradigm in**  
142 **ecophysiology presupposes all transport through stomata to be diffusive in nature,**  
143 **whereas my analysis, based on conservation of linear momentum, shows that**  
144 **non-diffusive transport also occurs in the form of "stomatal jets". In brief, because**  
145 **the exchange of water vapour dominates surface exchange of all gases, the**  
146 **evaporation rate defines a flow velocity away from the evaporating surface and**  
147 **consequent transport of all gases away from the evaporating surface. For the**  
148 **particular case of water vapour, the analysis shows that the specific humidity**  
149 **represents the fraction of water vapour transport that is non-diffusive. Students**  
150 **of thermodynamics know that, for a saturated environment such as that supposed**  
151 **by ecophysicologists within a stomatal cavity, the specific humidity increases nearly**  
152 **exponentially as a function of temperature. Thus, at extreme temperatures the**  
153 **role of non-diffusive transport becomes non-negligible and a decoupling is**  
154 **expected between exchanges of water vapour (whose egress is aided by non-**  
155 **diffusive transport) and carbon dioxide (whose ingress is opposed by the outgoing**  
156 **Stefan flow). At the extreme limit of the boiling point, the vapour pressure inside**  
157 **the stomatal cavity would equal the total air pressure, meaning that (1) water**  
158 **vapour would be the lone gas inside the stomatal cavity, therefore (2) no diffusion**

159 **could occur, and all transport would be non-diffusive (i.e., a specific humidity of**  
160 **100%), and therefore (3) no photosynthesis would be possible (with no CO<sub>2</sub>**  
161 **present). Since my analysis is soundly based on the laws of physics and**  
162 **satisfactorily explains the decoupling between photosynthesis and transpiration at**  
163 **high temperatures, I believe that the authors should take it into account when**  
164 **exploring this "previously overlooked vegetation-atmosphere feedback that may**  
165 **in fact dampen, rather than amplify, heat extremes". However, I hardly think it**  
166 **is my place to insist that other scientists cite my papers, and so must leave**  
167 **judgement of this matter to the editor.**

168 We thank the reviewer for their insight on this issue. However, we think that in order  
169 to argue for a paradigm shift ("*paradigm underlying the definition of the "stomatal*  
170 *conductance" is fundamentally incorrect*"), a certain weight of evidence, including  
171 measurements, will be required.

172

173 We will of course abide by the editor's decision here, but our feeling is that it would  
174 not really be appropriate to add any text regarding this work, given its relative newness  
175 and the fact that the paper referred to does not make explicit predictions for behaviour  
176 under heatwave conditions, nor even with rising temperatures. We instead would  
177 encourage the reviewer to develop their theory to make a prediction for the relative size  
178 of decoupling under heatwave conditions and test this against our published data (Drake  
179 et al. 2018, both the data and code to repeat the analysis are freely available). It might  
180 provide some empirical support for this novel and untested idea.
