# Supplementary material for: Examining the evidence for sustained transpiration during heatextremes
Source: Copernicus journal article supplement (doi:10.5194/bg-2018-399), 2018-09-24
Supplement: Supplementary file [file bg-2018-399-AC3-supplement.pdf]

1 We thank the reviewer for their constructive comments and we address their various  
2 concerns below. Referee comments are highlighted in bold, with our response below in  
3 each case.

4

5 **Recent findings on a leaf and tree level indicated that during heatwaves the**  
6 **photosynthesis (A) may decouple from the stomatal conductance (g<sub>s</sub>). In line**  
7 **with g<sub>s</sub>, transpiration (E) may increase while A does not which impacts**  
8 **instantaneous water use efficiency (WUE). De Kauwe's et al paper aims to**  
9 **extend this evidence on the ecosystem level analyzing eddy covariance data from**  
10 **mostly Australian forested ecosystems. Because the topic is novel and because**  
11 **the correlation between A and g<sub>s</sub> became central to many models the topic may**  
12 **be in a scope of a large audience.**

13 **Generally, the paper reads well. Data are demonstrated on figures which are**  
14 **mostly clear to understand.**

15 We thank the reviewer for this positive summary of our work.

16

17 **But I do not think that the research questions stated in the last paragraph of the**  
18 **introduction section fit the rest of the paper. That means, the paper focuses more**  
19 **on changes in instantaneous WUE (A/E) that on a decoupling of the g<sub>s</sub> from A.**  
20 **Of course, both may be described in the same paper but the reasoning in the**  
21 **introduction and in a discussion as well as the structure of results should be**  
22 **adjusted accordingly.**

23 The reviewer is correct that whilst we do talk about a decoupling between A and g<sub>s</sub>,  
24 our analysis is focussed on the response of ecosystem-scale quantities: flux-derived  
25 GPP and the flux of latent heat. However, we do not see that the question as stated,  
26 was inconsistent with our analysis - the transpiration (or latent heat flux) is in part an  
27 outcome of the leaf-level stomatal response, which we feel this was clearly  
28 articulated: "*In this paper we therefore explore eddy-covariance measurements to*  
29 *examine whether there is widespread field-based evidence that during heat extremes,*  
30 *trees decouple photosynthesis and g<sub>s</sub>, leading to increased transpiration. We chose to*

31 *focus on wooded ecosystems as the capacity to maintain transpiration throughout a*  
32 *heat extreme most likely requires deep soil water access and is in line with previous*  
33 *experimental evidence from trees (Drake et al., 2018; Urban et al., 2017)”.*

34 To further clarify this, we now also add to the above: “*In contrast to previous*  
35 *experimental studies (e.g. Urban et al. 2017), our focus is on the ecosystem-scale and*  
36 *so we analysed the photosynthetic decoupling between photosynthesis and*  
37 *transpiration.”*

38

39 **Further, I suggest a few points to work on: 1. Is it E or  $g_s$  which decouples from**  
40 **A during heatwaves?**

41 We agree with the reviewer this is an important point to clarify and we will do so in  
42 our revised manuscript. We have changed our sub-heading in the methods 2.1 from  
43 “*Evidence of photosynthesis-canopy conductance decoupling*” to “*Evidence of*  
44 *photosynthesis-transpiration decoupling*”.

45 We have also added text to this section to explain our approach: “*A number of*  
46 *previous studies reporting photosynthetic decoupling experimentally, have focused on*  
47 *the coupling between A and  $G_s$  (Weston and Bauerle, 2007; Ameye et al. 2012; von*  
48 *Caemmerer and Evans, 2015), as opposed to A and E (Drake et al. 2018). At the*  
49 *ecosystem-scale (eddy-covariance), coincident measurements of  $G_s$  and LE (or*  
50 *transpiration) are rarely available. Whilst it is possible to estimate the canopy  $G_s$  by*  
51 *inverting the Penman-Monteith using measured LE, such an approach necessitates*  
52 *additional assumptions related to the canopy boundary layer conductance (Jarvis and*  
53 *McNaughton, 1986; De Kauwe et al. 2017), the canopy net radiation and the ground*  
54 *heat flux (Medlyn et al. 2017). Here we avoid these assumptions by focusing our*  
55 *analysis on the measured LE flux, as opposed to an estimate of the canopy  $G_s$ .”*

56

57 **Both are interlinked but for the modeling purposes, I believe that A/ $g_s$  (i.e.**  
58 **intrinsic WUE) is more important than A/E (i.e. instantaneous WUE). On the**  
59 **other hand, increase in E while A does not change or decline during the**  
60 **heatwave is the important issue, too.**

61 We agree with the reviewer; however, outside of an experimental setting we do not  
62 have access to measurements of  $g_s$ . Here we are seeking to examine the evidence at  
63 the ecosystem-scale and as such, our focus is on the response of E. We agree, that a  
64 decoupling of  $A/g_s$  may not translate to  $A/E$  at the canopy/ecosystem-scale due to the  
65 level of control stomata have on transpiration (“decoupling”, Jarvis and McNaughton,  
66 1986) and environmental drivers (net radiation, wind speed, VPD). In our revised  
67 methods (see above) and discussion text we explain this point more fully.

68 The point the reviewer highlights speaks to the novelty of our approach, which  
69 considers responses at the ecosystem-scale and attempts to contextualise previous  
70 experimental work (e.g. Drake et al. 2018 and Urban et al. 2017).

71

72 **Many papers were published on E/ $g_s$  which assumed stomatal regulation to**  
73 **maximize the A for a fixed amount of water transpired over the long time period.**  
74 **This idea was recently challenged (i.e. Wolf et al. 2016, PNAS; Sperry et al. 2017,**  
75 **PCE) and De Kauwe et al. may want to work with this evidence, should they**  
76 **decide to aim their paper this way.**

77 In our revised discussion (4.2 Implications for models), we have addressed the point  
78 raised by the reviewer: *“The implications for modelling studies that focus on heat*  
79 *extremes are clear, particularly for studies in Australia. None of the current*  
80 *generation of land surface models have the capacity to decouple transpiration from*  
81 *the down-regulation of photosynthesis with increasing temperature. Instead models*  
82 *assume photosynthesis and  $g_s$  (and consequently transpiration) remain coupled at all*  
83 *times. As a result, climate models will underestimate the capacity of the vegetation to*  
84 *dampen heat extremes in simulations for Australia. This is also true of more*  
85 *sophisticated plant hydraulic models (Williams et al. 2001) and profit-maximisation*  
86 *approaches (Wolf et al. 2015; Sperry et al. 2016) that hypothesise the cost of water is*  
87 *not fixed in time, but instead increases with increasing water stress. For these latter*  
88 *approaches to account for a photosynthetic decoupling they would need to prioritise*  
89 *maintaining an optimum canopy temperature above a net carbon gain. However,*  
90 *mechanisms to capture this within models should likely wait for further supporting*  
91 *evidence of photosynthetic decoupling.”*

92

93 **Furthermore, I do not believe that trees should keep a fixed A/E ratio in a short**  
94 **time (i.e. a few days of a heatwave). That said, imagine the temperature is fixed**  
95 **to a specific value (i.e. 25 oC) and vapor pressure deficit (VPD) increases from**  
96 **near zero to a couple thousand Pa (scenario unlikely to happen in nature but**  
97 **good to demonstrate the change in WUE). Photosynthesis would decline due to**  
98 **stomatal closure as a response to the increase in VPD, but the transpiration**  
99 **would increase.**

100 This is why we also analysed the eddy-covariance data from the perspective of WUE,  
101 to attempt to disentangle any decoupling from the response to increasing VPD.

102

103 **2. Should authors want to focus more on A/g<sub>s</sub> relationship, I believe the analysis**  
104 **which clearly demonstrates the change in (or lack of) the response should be**  
105 **presented.**

106 As mentioned above, it is not possible to show the A/g<sub>s</sub> relationship from eddy-  
107 covariance data. To do so would require inverting the Penman-Monteith equation  
108 from measured LE flux. Whilst this approach has been used, it requires a series of  
109 assumptions related to the canopy aerodynamic conductance, it is far clearer to  
110 analysis the measured flux. See added text above.

111

112 **While I do not challenge the approach of  $GPP \times D^{0.5}$  here, I do not think it is**  
113 **enough illustrative. Many readers, including me, are not familiar with this**  
114 **approach.**

115 We agree that we were not clear enough in our explanation of this approach, a point  
116 that the other reviewer also highlighted. In our revised methods, we now explain why  
117 we took this approach: *“As temperature increases, vapour pressure deficit (D) also*  
118 *increases, which will drive an increase in LE unless there is stomatal closure, but this*  
119 *effect is unrelated to the decoupling mechanism we seek to find. To disentangle the*  
120 *potentially contributing role of D, we also explored these data based on the theoretical*

121 expectation (Lloyd et al. 1991; Medlyn et al. 2011; Zhou et al. 2014) that transpiration  
122 ( $E$ ) is approximately proportional to  $GPP \times D^{0.5}$  ( $g C kPa^{0.5} m^{-2} d^{-1}$ ; Eqn. 7). This  
123 expectation is based the idea of optimal stomatal behaviour proposed by Cowan and  
124 Farquhar (1977) that stomata should be regulated so as to maximise photosynthetic  
125 carbon gain less the cost of transpiration. Medlyn et al. (2011) derived the optimal  
126 stomatal behaviour as:

$$G_s = 1.6 \left( 1 + \frac{g_1}{\sqrt{D}} \right) \frac{A}{C_a} \quad (1)$$

127 where  $G_s$  is canopy stomatal conductance to  $CO_2$  ( $mol m^{-2} s^{-1}$ ),  $A$  is the net assimilation  
128 rate ( $\mu mol m^{-2} s^{-1}$ ),  $C_a$  is the ambient atmospheric  $CO_2$  concentration ( $\mu mol mol^{-1}$ ),  $D$   
129 is the vapour pressure deficit (kPa), the parameter  $g_1$  ( $kPa^{0.5}$ ) is a fitted parameter  
130 representing the sensitivity of the conductance to the assimilation rate and the factor  
131 1.6 is the ratio of diffusivity of water to  $CO_2$  in air. Assuming that transpiration is  
132 largely controlled by conductance, this relationship can be rearranged to show that  
133 water-use efficiency ( $A/E$ ) is approximately proportional to  $1/\sqrt{D}$ . This dependence has  
134 been remarked by many authors (e.g. Lloyd et al. 1991, Katul et al. 2009). Based on  
135 this dependence, Zhou et al. (2014, 2015) proposed an “underlying water-use  
136 efficiency” ( $uWUE$ ) for eddy covariance data:

$$uWUE \approx \frac{GPP\sqrt{D}}{E} \quad (2)$$

137

138 Zhou et al. (2014) argued that the  $D^{0.5}$  term provided a better linear relationship  
139 between  $GPP$  and  $E$ . Thus, to probe the effect of  $D$ , we focused on heatwaves (i.e.  
140 approach 2) and plotted  $LE$  expressed as evapotranspiration ( $mm day^{-1}$ ), as a function  
141 of  $GPP \times D^{0.5}$ .”

142

143 **It would be much better to demonstrate directly how  $A$  changes with a change in**  
144  **$g_s$  (or canopy conductance,  $g_c$ ). There are approaches to calculate  $g_c$  from sap**  
145 **flow measurements (which I use). I do not know how reliable are approaches to**  
146 **calculate  $g_c$  from eddy covariance data but if  $g_c$  can be somehow derived I would**  
147 **be in favor of using it.**

148 See response above.

149

150 **3. The timescale of the temperature vs. GPP data. Why did the authors decide to**  
151 **use the maximal daily temperature and compare it to the daily sum of the GPP?**  
152 **Would not it be more appropriate to work with half an hour (or hour) resolution**  
153 **in both temperature and GPP?**

154 The suggested approach is of course a viable analysis framework; however, it would  
155 increase the time-resolution (and so the noise in the data) without necessarily adding  
156 any additional insight. Our approach analysed multiple heat-extreme events, across  
157 multiple site, this would not be possible (or would be harder) if we disaggregated this  
158 into diurnal, 4-day events. Here, we are seeking to see the broader patterns at  
159 behaviour at the ecosystem-scale.

160

161 **4. What is the temperature optimum of photosynthesis for the plants in studied**  
162 **ecosystems? The temperature of 37°C for a part of the day may not be high**  
163 **enough to visibly affect the daily GPP. 5.**

164 The temperature optima for leaf and canopy photosynthesis in Eucalypts in southern  
165 Australia are well below 30 degrees (see Duursma et al. 2014; Drake et al. 2016;  
166 Kumarathunge et al. in review), suggesting that days above 37 degrees should induce  
167 a decline in GPP. We also analysed heatwave events (defined as least three  
168 consecutive days where the maximum daily temperature exceeded 35°C).

169 We have addressed this point in our new discussion sub-section (4.1 Why did we not  
170 find supporting evidence for ecosystem-scale photosynthetic decoupling?),  
171 specifically: “*One could ask whether our analysis considered hot enough*  
172 *temperatures (> 37 °C) to trigger a photosynthetic decoupling mechanism. For*  
173 *example, during an imposed heatwave, Ameye et al. (2012) probed the decoupling*  
174 *mechanism at daily maximum temperatures between 47 and 53°C. Similarly, Zhu et*  
175 *al. (2018) found that most of the 62 species sampled across Australia exhibited*  
176 *maximum critical temperatures near 50°C. However, the temperature optima for leaf*  
177 *and canopy photosynthesis in Eucalypts in southern Australia are well below 30*  
178 *degrees (see Duursma et al. 2014; Drake et al. 2016; Kumarathunge et al. in review),*  
179 *suggesting that days above 37°C should induce a decline in GPP. Our analysis also*

180 *included events with daily maximum temperatures of greater than 40°C and*  
181 *consecutive heatwave days > 35°C. Therefore, we would argue that insufficiently*  
182 *high temperatures are unlikely to explain why we did not see clear evidence when*  
183 *looking at eddy covariance data.”*

184

185 **Is there any information available how much trees and understory (grasses)**  
186 **contribute to the LAI and to the GPP?**

187 Across all of these flux sites we analysed, the simple answer is no. We have now added  
188 a statement on this issue of leaf area adjustment to our new discussion: “*Finally,*  
189 *although Drake et al. (2018) did not find evidence of increased litterfall during their*  
190 *heatwave experiment, it is of course possible that at our sites, there was some reduction*  
191 *in leaf area in response to high extremes. Any leaf area reduction would in turn reduce*  
192 *transpiration and thus may offset ecosystem-scale estimates of a photosynthetic*  
193 *decoupling.”*

194

195
